# Supplementary material
Source: PubMed Central journal article supplement (PMC4746604)
Supplement: cr2015152x1.pdf [file cr2015152x1.pdf]

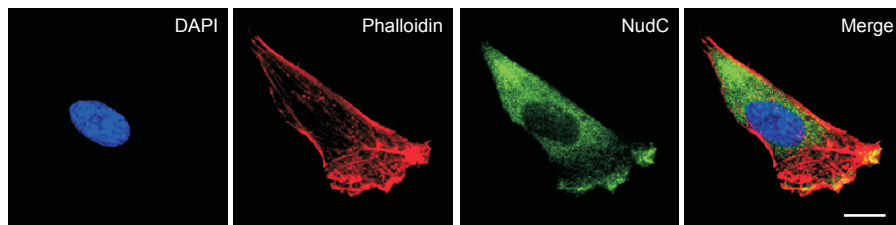

**Supplementary information, Figure S1** The cellular localization of NudC together with actin in RPE-1 cells. RPE-1 cells are subjected to immunofluorescence analysis with anti-NudC antibodies (green) and phalloidin (red). DNA is stained with DAPI (blue). Scale bar, 10  $\mu\text{m}$ .
