# Supplementary material
Source: PubMed Central journal article supplement (PMC4746604)
Supplement: cr2015152x2.pdf [file cr2015152x2.pdf]

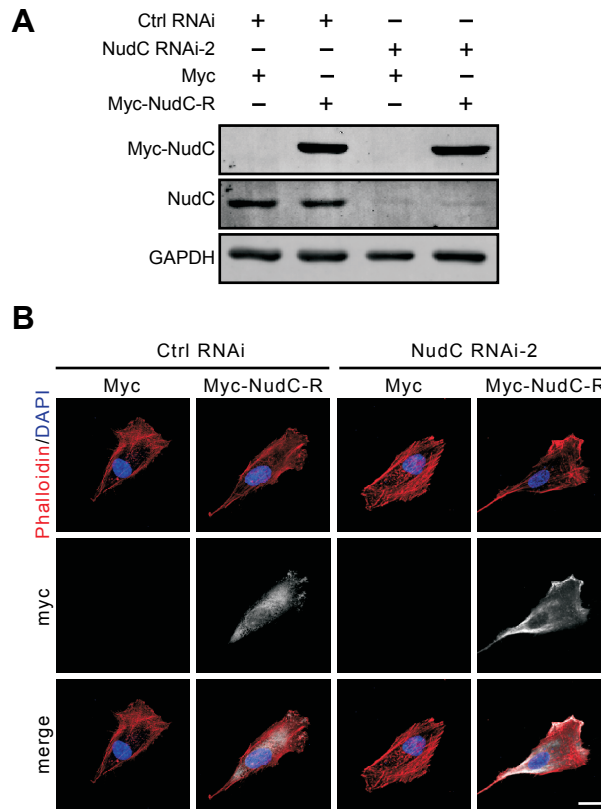

**Supplementary information, Figure S2** Ectopic expression of NudC rescues the actin defects induced by NudC depletion. RPE-1 cells treated with the indicated RNAi and expression vectors are subjected to following analyses. (A) Immunoblotting showing efficient expression of Myc-NudC-R (RNAi-resistant NudC vector) in NudC-depleted cells. (B) Immunofluorescence with F-actin (red) and Myc antibody (gray) shows exogenous expression of NudC reverses thick stress fibers in NudC-depleted cells. Scale bar, 20  $\mu$ m.
