# Supplementary material
Source: PubMed Central journal article supplement (PMC4746604)
Supplement: cr2015152x3.pdf [file cr2015152x3.pdf]

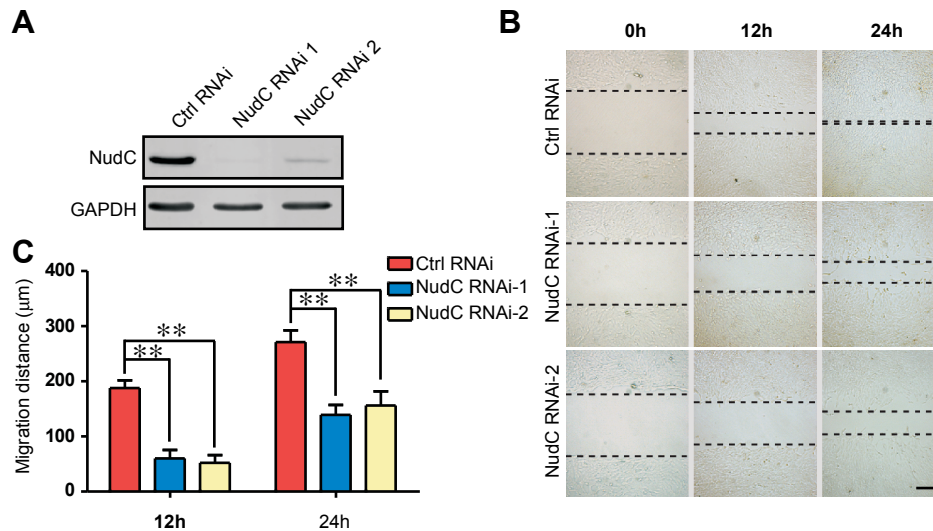

**Supplementary information, Figure S3** Knockdown of NudC impairs collective cell migration. RPE-1 cells treated with the indicated RNAi are subjected to the following analyses. (A) Western blotting showing efficiency of NudC depletion. GAPDH is the internal control. (B, C) Scratch wound assay reveals that the migration of NudC-depleted cells is significantly slower than that of the control. Cell migration is monitored with DIC microscopy (B). Black dashed lines define the areas lacking cells. Scale bar, 200  $\mu\text{m}$ . The migration distance is measured by Image J software (C). Quantitative data derived from three independent experiments are shown as mean  $\pm$  SD. \*\* $P < 0.01$ .
