# Supplementary material
Source: PubMed Central journal article supplement (PMC4746604)
Supplement: cr2015152x4.pdf [file cr2015152x4.pdf]

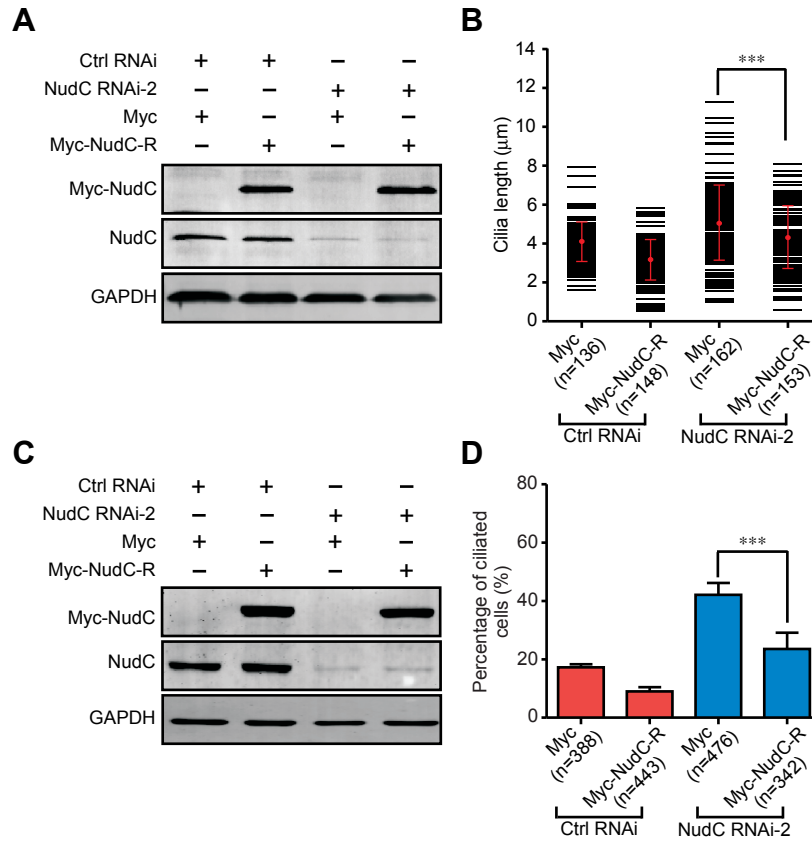

**Supplementary information, Figure S4** Exogenous expression of NudC rescues the ciliary defects induced by NudC depletion. (A-D) RPE-1 cells treated with the indicated RNAi and expression vectors are applied for western blotting and immunofluorescence for cilia with serum starvation (A, B) or not (C, D). Immunoblotting shows efficient expression of Myc-NudC-R in NudC-depleted cells (A, C). Cilia length is determined by Image J software. The ciliated cells are also calculated. Quantitative data derived from three independent experiments are shown as mean  $\pm$  SD. n, sample size. \*\*\* $P < 0.001$ .
