# Supplementary material
Source: PubMed Central journal article supplement (PMC4746604)
Supplement: cr2015152x5.pdf [file cr2015152x5.pdf]

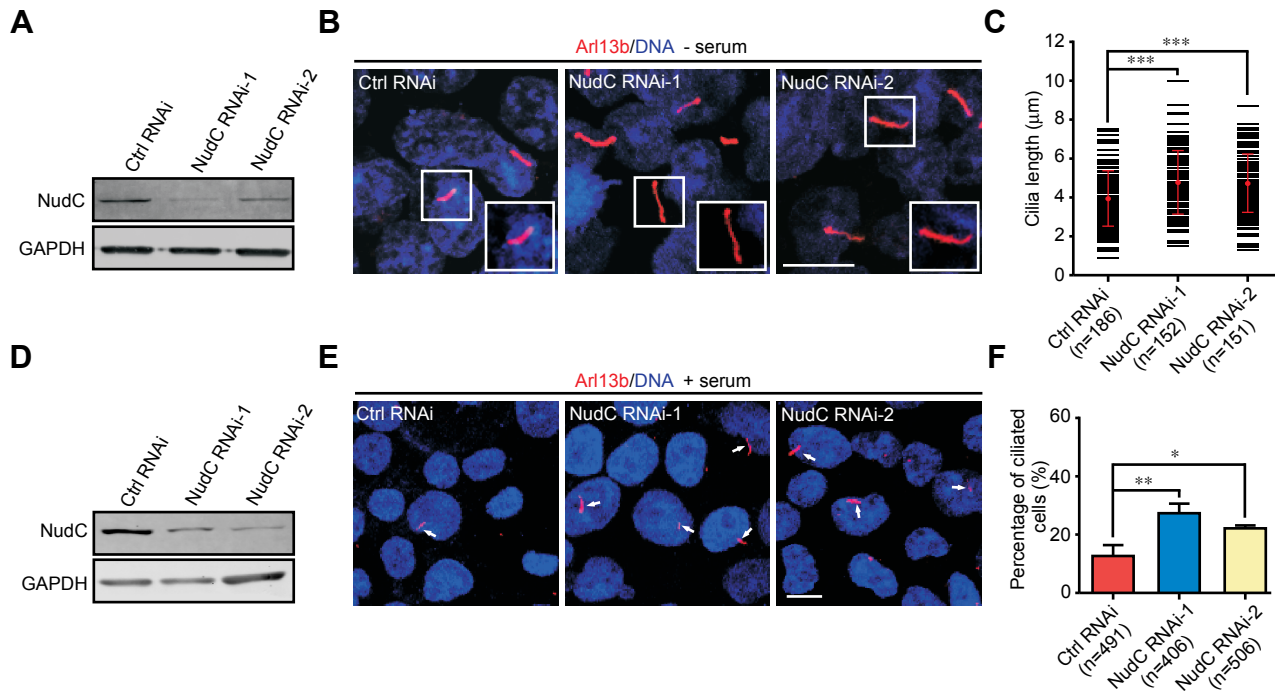

**Supplementary information, Figure S5** NudC suppresses ciliogenesis in HEK293T cells. (A-C) HEK293T cells treated with either NudC RNAi-1 or -2 are subjected to the following analyses under serum starvation. Western blotting shows efficient knockdown in NudC-depleted cells (A). Immunostaining with anti-Arl13b (cilia marker) antibody reveals that NudC depletion leads to an increase in cilia length (B). High magnifications are shown in insets. Cilia length is determined by Image J software (C). (D-F) HEK293T cells were treated with either NudC RNAi-1 or -2 and applied for the experiments below. Western blotting confirms sufficient suppression in cells depleted of NudC (D). Immunofluorescence exhibits spontaneous ciliogenesis in NudC knockdown cells (E). Cells with cilia are calculated (F). DNA is visualized by DAPI. Scale bars represent 10  $\mu\text{m}$ . Each bar represents mean  $\pm$  SD of at least three independent experiments. n, sample size. \* $P < 0.05$ ; \*\* $P < 0.01$ ; \*\*\* $P < 0.001$ .
