# Supplementary material
Source: PubMed Central journal article supplement (PMC4746604)
Supplement: cr2015152x6.pdf [file cr2015152x6.pdf]

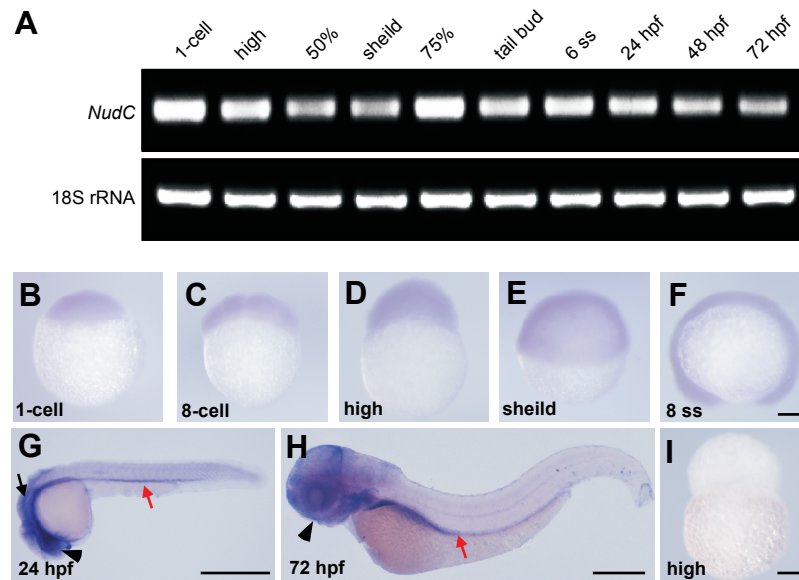

**Supplementary information, Figure S6** *NudC* expression patterns during zebrafish development. Wild-type zebrafish embryos were harvested at the indicated times and subjected to the following analyses. hpf, hour post fertilization; ss, somite stage; %, percent epiboly. (A) RT-PCR analysis shows ubiquitous expression of *NudC* during zebrafish development. 18S *rRNA* is used as the internal control. (B-I) Whole-mount in situ hybridization exhibits *NudC* expression in brain, eyes, pronephros and so on. Side views of early-stage embryos with animal pole to the top are shown (B-F). Embryos at 24 hpf and 72 hpf (side views) are oriented with anterior to the left and dorsal to the top (G, H). Black arrow and arrowheads show brain and eye, respectively. Red arrows indicate pronephric ducts. Sense control of high stage is also included (I). Scale bar, 500  $\mu$ m.
