# Supplementary material
Source: PubMed Central journal article supplement (PMC4746604)
Supplement: cr2015152x7.pdf [file cr2015152x7.pdf]

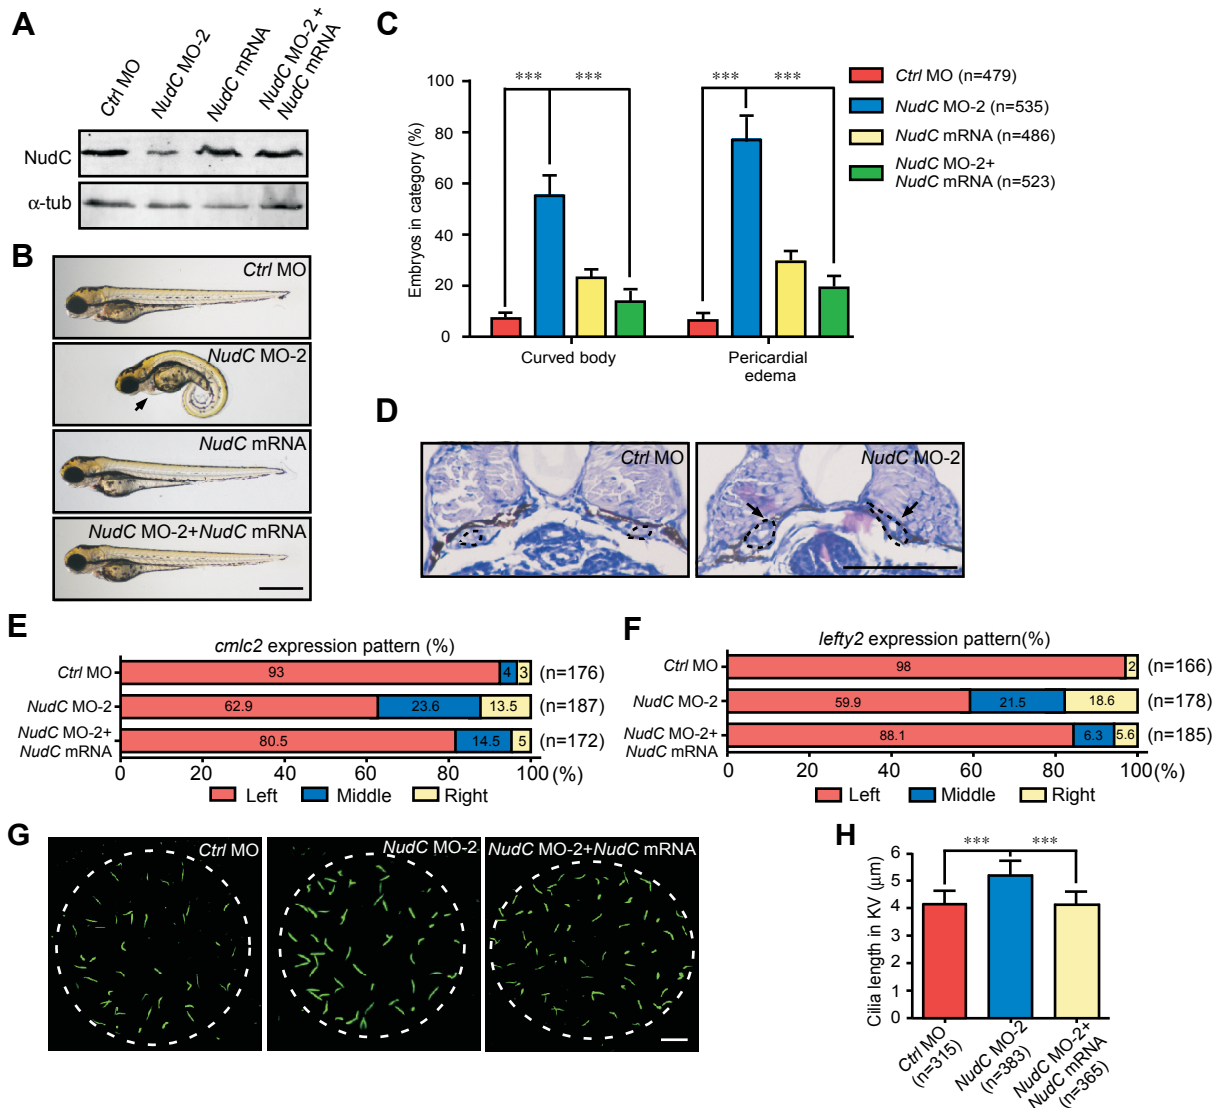

**Supplementary information, Figure S7** Zebrafish embryos injected with *NudC* MO-2 exhibit multiple ciliary defects. Embryos treated with 4 ng *Ctrl* MO, 4 ng *NudC* MO-2, 25 pg *NudC* mRNA or 4 ng *NudC* MO-2 plus 25 pg *NudC* mRNA were collected at the indicated times. (A) Immunoblotting analysis showing efficiency of *NudC* knockdown.  $\alpha$ -tub is used as the internal control. (B, C) Bright-field micrographs showing body curvature and pericardial edema (arrow) in zebrafish injected with *NudC* MO-2 at 72 hpf. Scale bar, 500  $\mu$ m. (D) Cross-sections of *NudC* morphant show dilated pronephric ducts (arrows) at 72 hpf. Black dashed lines indicate the boundaries of pronephric ducts. Scale bar, 200  $\mu$ m. (E, F) Percentage of the different expression patterns of *cmhc2* (E) or *lefty2* (F) mRNA reveals that *NudC* morphant exhibits defective left-right asymmetry. (G, H) Immunofluorescence with anti-ace-tub antibody (green) shows longer cilia in KV of *NudC* morphant at 8 ss. Scale bar, 10  $\mu$ m. Cilia length in KV is measured by Image J software. Quantitative data derived from three independent experiments are shown as mean  $\pm$  SD. n, sample size. \*\*\* $P < 0.001$ .
