# Supplementary material
Source: PubMed Central journal article supplement (PMC4746604)
Supplement: cr2015152x9.pdf [file cr2015152x9.pdf]

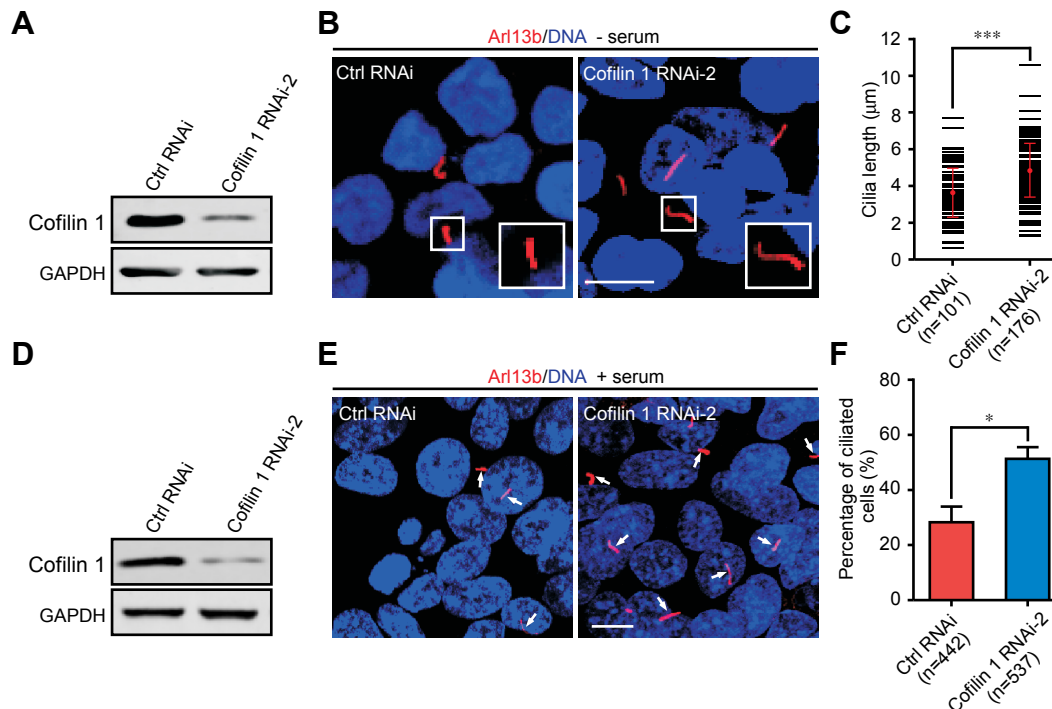

**Supplementary information, Figure S9** Cofilin 1 inhibits cilia assembly in HEK293T cells. (A-C) HEK293T cells are transfected with cofilin 1 RNAi-2 and subjected to the following analyses under serum starvation. Immunoblotting showing sufficient knockdown in cells depleted of cofilin 1 (A). Immunofluorescence reveals that depletion of cofilin 1 causes an increase in cilia length (B). Insets show higher magnifications of cilia. Cilia length is determined by Image J software (C). (D-F) Cells treated with cofilin 1 RNAi-2 are applied for the experiments below. Western blotting confirms efficient depletion in cofilin 1 RNAi cells (D). Immunostaining showing spontaneous ciliogenesis in cells depleted of cofilin 1 (E). The cells with cilia are calculated (F). DNA is labeled by DAPI. The scale bars represent 10  $\mu\text{m}$ . Each bar represents mean  $\pm$  SD of at least three independent experiments. n, sample size. \* $P < 0.05$ ; \*\* $P < 0.001$ .
