# Supplementary material
Source: PubMed Central journal article supplement (PMC4746604)
Supplement: cr2015152x10.pdf [file cr2015152x10.pdf]

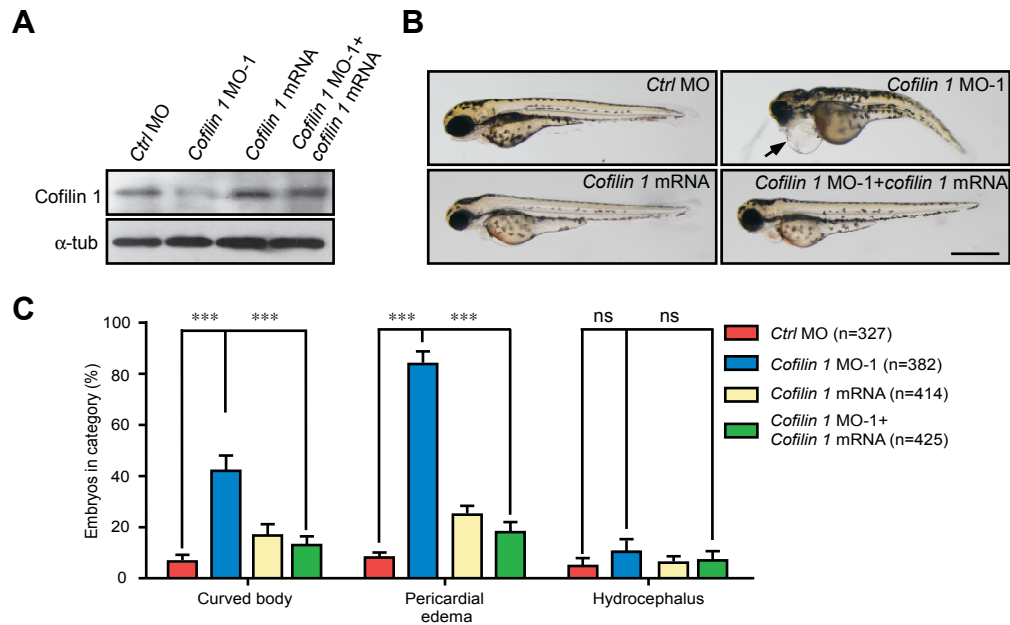

**Supplementary information, Figure S10** Exogenous expression of cofilin 1 mRNA rescues the ciliary defects in cofilin 1 morphants. Embryos injected with *Ctrl* MO (2.0 ng), *cofilin 1* MO (2.0 ng), *cofilin 1* mRNA (25 pg) or *cofilin 1* MO (2.0 ng) plus *cofilin 1* mRNA (25 pg) were harvested at the indicated times and applied for immunoblotting and phenotype analysis. (A) Western analysis revealing the protein levels of cofilin 1 in zebrafish embryos injected with the indicated MO and mRNA. (B, C) Bright-field micrographs showing body curvature and pericardial edema (arrow) in cofilin 1 morphant at 72 hpf (B). Scale bar, 500  $\mu$ m. Quantitative data of three independent experiments are presented as the mean  $\pm$  SD (C). n, sample size. \*\*\* $P < 0.001$ ; ns, not significant ( $P > 0.05$ ).
