# Supplementary material
Source: PubMed Central journal article supplement (PMC4746604)
Supplement: cr2015152x13.pdf [file cr2015152x13.pdf]

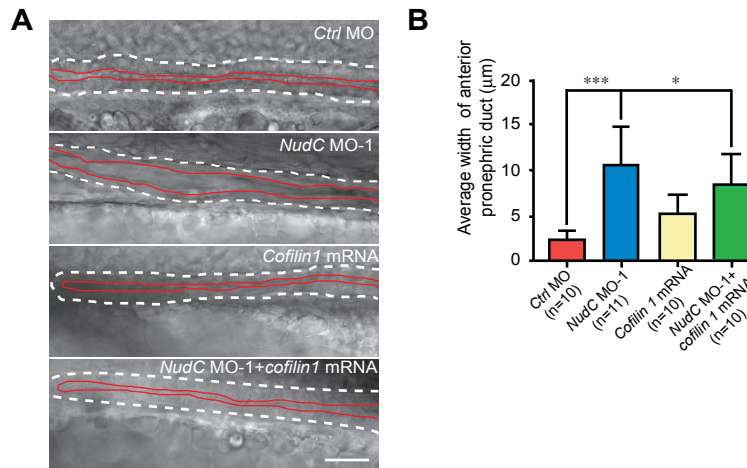

**Supplementary information, Figure S13** Cofilin 1 partially rescues the enlarged pronephric duct in NudC morphants. (A, B) Embryos injected with 2.5 ng *Ctrl* MO, 2.5 ng *NudC* MO-1, 25 pg *cofilin 1* mRNA or 2.5 ng *NudC* MO-1 plus 25 pg *cofilin 1* mRNA were harvested at 48 hpf. Images from video microscopy of anterior pronephric ducts exhibit that cofilin 1 is able to partially reverse the enlarged pronephric duct in NudC morphant. Embryos (lateral views) are oriented with anterior to the left and dorsal up (A). White dashed lines and red lines show the boundaries and lumens of pronephric ducts, respectively. Scale bar, 20 μm. The width of lumen is measured by Image J software (B). The data are represented as mean ± SD derived from three independent experiments. n, sample size. \* $P < 0.05$ ; \*\* $P < 0.001$ .
