# Supplementary material
Source: PubMed Central journal article supplement (PMC4746604)
Supplement: cr2015152x14.pdf [file cr2015152x14.pdf]

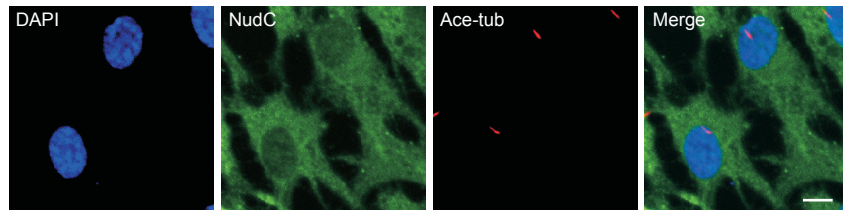

**Supplementary information, Figure S14** The cellular localization of NudC in RPE-1 cells. Immunofluorescence with the indicated antibodies reveals that NudC mainly distributes in cytoplasm, but not in primary cilia under serum starvation. DNA is stained with DAPI (blue). Scale bar, 10  $\mu\text{m}$ .
