# Supplementary material
Source: PubMed Central journal article supplement (PMC4746604)
Supplement: cr2015152x15.pdf [file cr2015152x15.pdf]

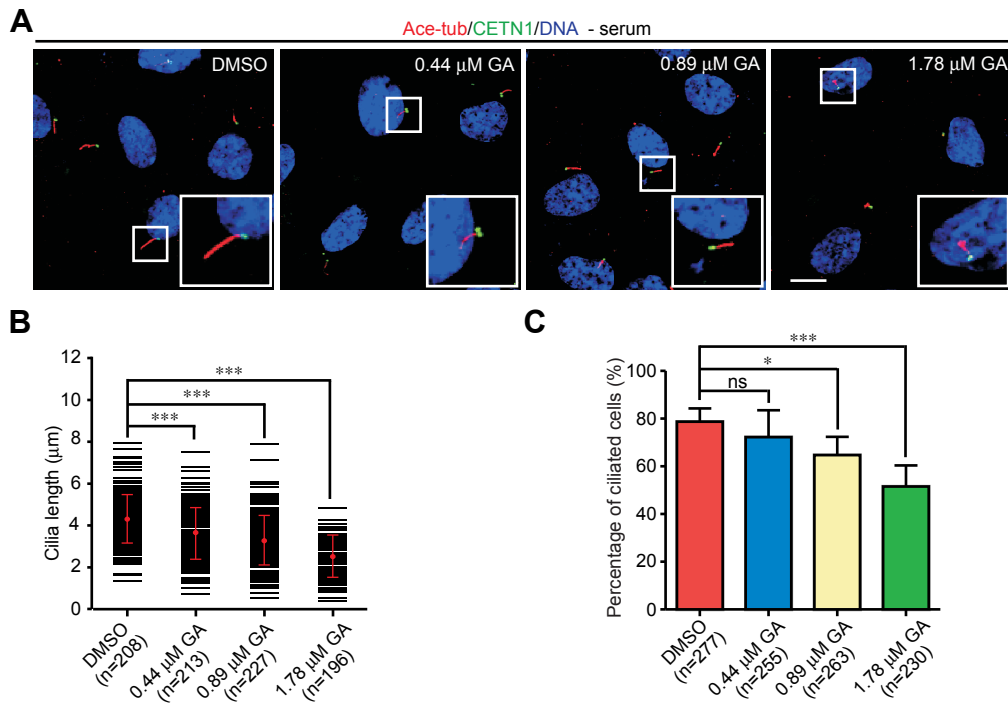

**Supplementary information, Figure S15** Inhibition of Hsp90 activity suppresses ciliogenesis in mammalian cells. (A-C) Serum-starved RPE-1 cells were treated with geldanamycin (GA) at different doses and subjected to immunostaining. Insets show higher magnifications of the boxed regions (A). Scale bar, 10  $\mu\text{m}$ . Cilia length is measured by Image J software (B). Ciliated cells are also calculated (C). Quantitative data derived from three independent experiments are shown as mean  $\pm$  SD. n, sample size. \* $P < 0.05$ ; \*\* $P < 0.001$ ; ns, not significant ( $P > 0.05$ ).
