# Supplementary material
Source: PubMed Central journal article supplement (PMC4746604)
Supplement: cr2015152x16.pdf [file cr2015152x16.pdf]

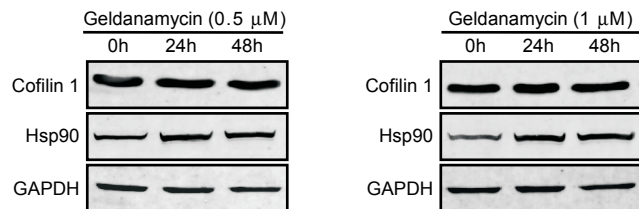

**Supplementary information, Figure S16** Inhibition of Hsp90 activity has no significant effect on the protein level of cofilin 1. RPE-1 cells were treated with geldanamycin at different concentrations for the indicated times and subjected to Western analysis with anti-cofilin 1 and Hsp90 antibodies. GAPDH is the loading control.
